# Supplementary material
Source: PubMed Central journal article supplement (PMC2685753)
Supplement: ddp137_1.pdf [file ddp137_1.pdf]

**Loss of the imprinted snoRNA *mbii-52* leads to increased *5htr2c* pre-RNA editing and altered 5HT<sub>2c</sub>R mediated behaviour**

Christine Doe, Dinko Relkovic, Alastair S. Garfield, Jeffrey W. Dalley, David E. H. Theobald, Trevor Humby, Lawrence S. Wilkinson & Anthony R. Isles

**Supplementary Table S1 – Primer sequences**

| <b>Editing analysis</b> |                                  |
|-------------------------|----------------------------------|
| <b>Gene</b>             | <b>Primer sequence</b>           |
| <i>5htr2c</i>           | 5'-TATTTGTGCCCGTCTG-3'           |
|                         | 5'-GAGCACGCAGGTAGTATT-3'         |
| <i>Glur2</i>            | 5'-GGATTCCAAAGGCTACGGC-3'        |
|                         | 5'-CTTGCTCACTGAGTTTCAATACTGC-3'  |
| <b>Real-time qPCR</b>   |                                  |
| <b>Gene</b>             | <b>Primer sequence</b>           |
| <i>5htr2c</i> -full     | 5'-CATCATGAAGATTGCCATCGTT-3'     |
|                         | 5'-CGCAGGTAGTATTATTCACGAACACT-3' |
| <i>5htr2c</i> -trunc    | 5'-ATCGCTGGACCGGAGTTTC-3'        |
|                         | 5'-GGGTCATTGAGCACGCAGG-3'        |
| <i>5htr1a</i>           | 5'-GACGGTCAAGAAGGTGGAAA-3'       |
|                         | 5'-CACTGCGCCTGCAGTCCC-3'         |
| <i>5htr1b</i>           | 5'-GTCACTGGACGCTGGACAC-3'        |
|                         | 5'-GGGCGATGACACAGAGATGC-3'       |
| <i>5htr2a</i>           | 5'-GGTTTCCTTGTCATGCCCG-3'        |
|                         | 5'-GACGCCGTGGAGAAGAGC-3'         |
| <i>5htr2b</i>           | 5'-GAAGCCACAGAAGACAAGCG-3'       |
|                         | 5'-GATTCAGGCTCTCGAAGATGG-3'      |
| <i>5htr4</i>            | 5'-GCTGGAACAACATCGGCATA-3'       |
|                         | 5'-ACCACAGAGCAGGTGATAGCATAG-3'   |
| <i>5htr5a</i>           | 5'-GGCTCCAGGAAGACCAACAG-3'       |
|                         | 5'-TTCTGTCTGGAAGGTGACGGT-3'      |
| <i>mbi-36</i>           | 5'-CTTGACCAACTGGGCATCG-3'        |
|                         | 5'-GTACCCACCTGCATGCGG-3'         |
| <i>dynein</i>           | 5'-GGACATTGCTGCCTATATCAAGAAG-3'  |
|                         | 5'-CGTGTGTGACATAGCTGCCAA-3'      |
| <i>18s rRNA</i>         | 5'-GTAACCCGTTGAACCCATT-3'        |
|                         | 5'-CCATCCAATCGGTAGTAGCG-3'       |
